# Supplementary material for: Excimer emission induced intra-system self-absorption enhancement – a novel strategy to realize high efficiency and excellent stability ternary organic solar cells processed in green solvents
Source: Royal Society of Chemistry journal article supplement (doi:10.1039/c8ta09350d), 2018-01-01
Supplement: c8ta09350d1.pdf [file c8ta09350d1.pdf]

## Supporting Information

### Excimer Emission Induced Intra-system Self-absorption Enhancement - A Novel Strategy to Realize High Efficiency and Excellent Stability Ternary Organic Solar Cells Processed in Green Solvent

Xiaoyang Du,<sup>a,‡</sup> Bin Liu,<sup>b,c,‡</sup> Lijuan Li,<sup>a</sup> Xiao Kong,<sup>a</sup> Caijun Zheng,<sup>a</sup> Hui Lin,<sup>a</sup> Qingxiao Tong,<sup>c\*</sup>

Silu Tao<sup>a\*</sup> and Xiaohong Zhang<sup>d</sup>

<sup>a</sup> *School of Optoelectronic Science and Engineering, University of Electronic Science and  
Technology of China (UESTC), Chengdu 610054, P. R. China*

<sup>b</sup> *Department of Physics, Fudan University, Shanghai 200433, P. R. China*

<sup>c</sup> *Department of Chemistry and Key Laboratory for Preparation and Application of Ordered  
Structural Materials of Guangdong Province, Shantou University, Guangdong 515063, P. R.*

*China*

<sup>d</sup> *Institute of Functional Nano & Soft Materials (FUNSOM), Soochow University, Suzhou 215123,*

*P. R. China*

---

\* Corresponding author: [qxtong@stu.edu.cn](mailto:qxtong@stu.edu.cn) (Q. X. Tong); [silutao@uestc.edu.cn](mailto:silutao@uestc.edu.cn) (S. L. Tao);

<sup>‡</sup> Xiaoyang Du and Bin Liu contributed equally to this work.

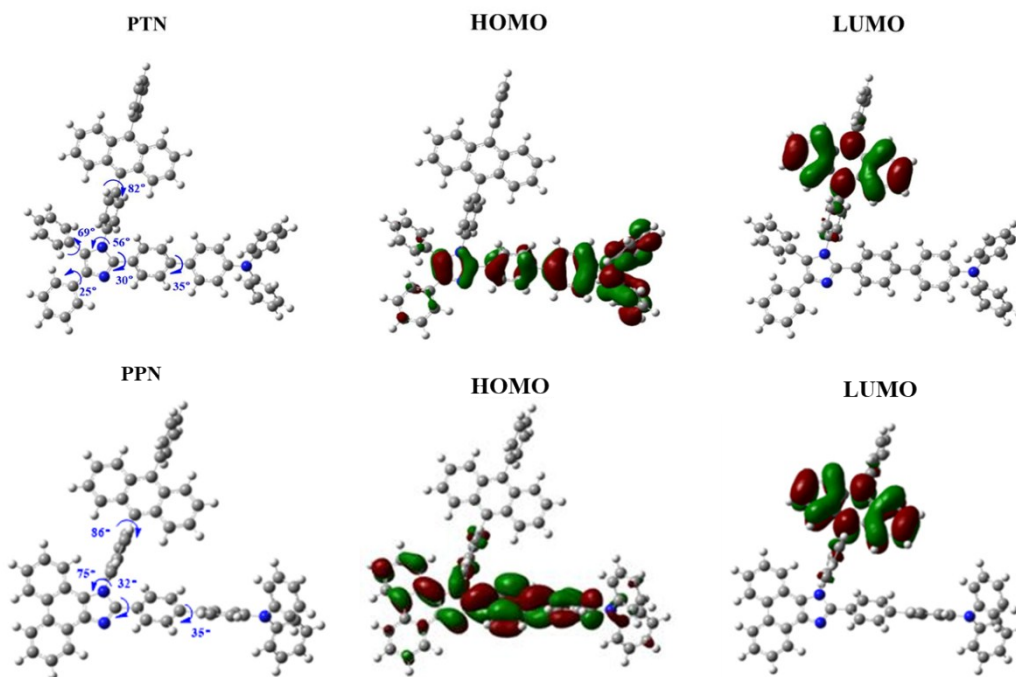

**Figure S1.** Calculated HOMO and LUMO distributions of PTN and PPN.

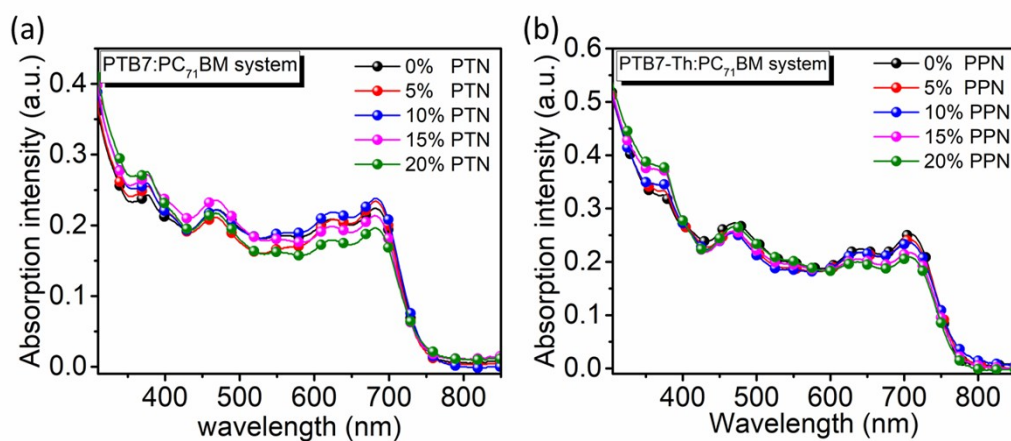

**Figure S2.** (a) absorption spectra of PTB7: PTN: PC<sub>71</sub>BM based ternary films; (b) absorption spectra of PTB7-Th: PPN: PC<sub>71</sub>BM based ternary films.

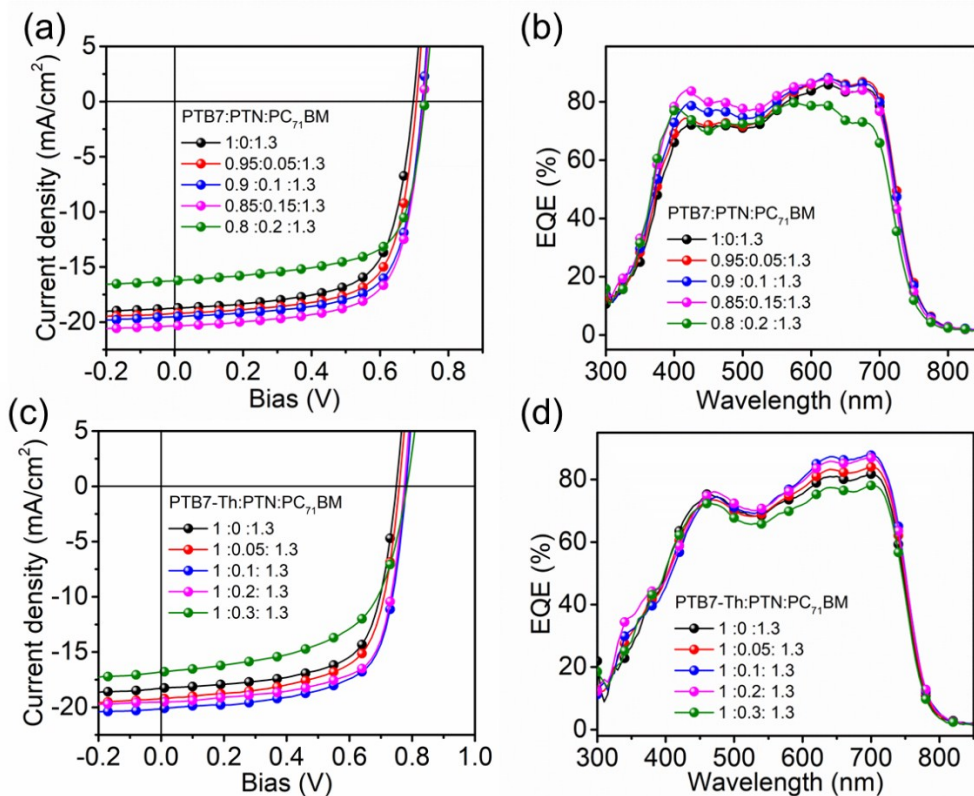

**Figure S3.** J-V (a) and EQE (b) curves for PTB7:PTN:PC<sub>71</sub>BM based OSCs; J-V characteristics (c) and EQEs (d) of PTB7-Th:PTN:PC<sub>71</sub>BM based OSCs with consistent PTB7-Th.

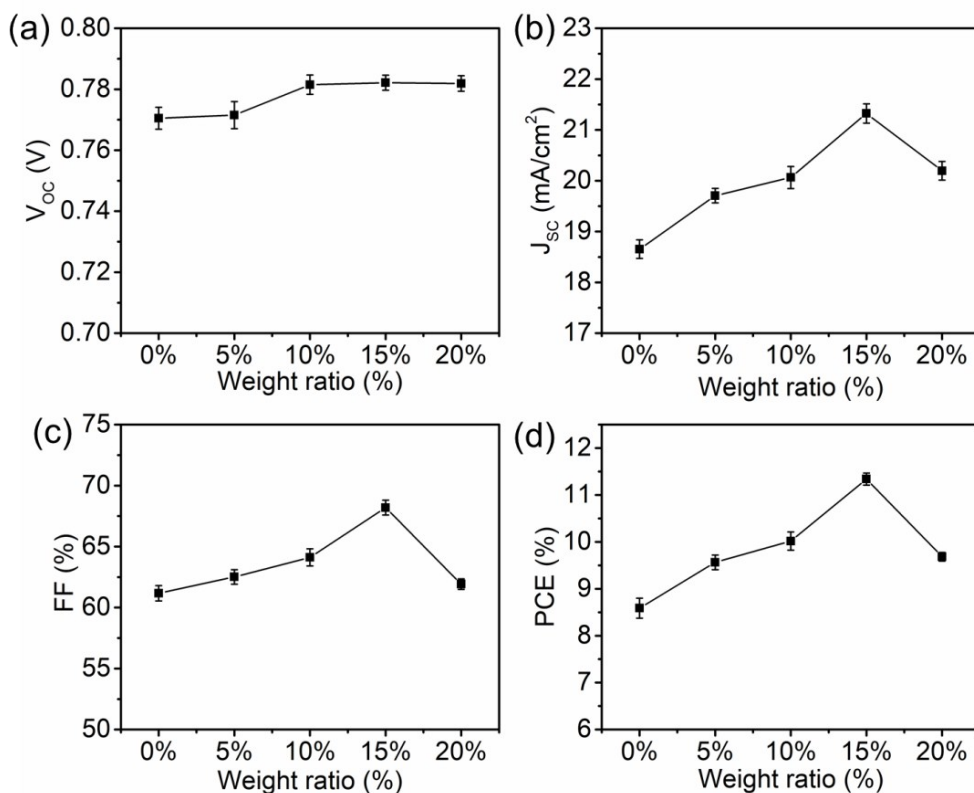

**Figure S4.** (a)-(d) V<sub>OC</sub>, J<sub>SC</sub>, FF, and PCE values of PTB7-Th:PTN:PC<sub>71</sub>BM contained device with different PTN contents. These data were collected from 20 samples.

**Table S1.** Performance summaries of PTB7: PTN: PC<sub>71</sub>BM based OSCs

| <b>PTB7:PTN:PC<sub>71</sub>BM</b> | <b>V<sub>oc</sub> (V)</b> | <b>J<sub>sc</sub> (mA/cm<sup>2</sup>)</b> | <b>J<sub>calc</sub><sup>a</sup> (mA/cm<sup>2</sup>)</b> | <b>FF (%)</b> | <b>PCE(average)<sup>b</sup> (%)</b> |
|-----------------------------------|---------------------------|-------------------------------------------|---------------------------------------------------------|---------------|-------------------------------------|
| <b>100:0:130</b>                  | <b>0.71</b>               | <b>18.22</b>                              | <b>18.03</b>                                            | <b>63.02</b>  | <b>8.16 (7.99)</b>                  |
| <b>95:5:130</b>                   | <b>0.72</b>               | <b>19.61</b>                              | <b>18.96</b>                                            | <b>68.99</b>  | <b>9.77 (9.36)</b>                  |
| <b>90:10:130</b>                  | <b>0.72</b>               | <b>19.98</b>                              | <b>19.40</b>                                            | <b>69.60</b>  | <b>10.10 (9.82)</b>                 |
| <b>85:15:130</b>                  | <b>0.72</b>               | <b>20.65</b>                              | <b>19.88</b>                                            | <b>70.14</b>  | <b>10.43 (10.21)</b>                |
| <b>80:20:130</b>                  | <b>0.72</b>               | <b>16.98</b>                              | <b>16.45</b>                                            | <b>67.71</b>  | <b>8.28 (8.03)</b>                  |
| <b>85:15:130<sup>c</sup></b>      | <b>0.73</b>               | <b>19.82</b>                              | <b>19.47</b>                                            | <b>71.30</b>  | <b>10.32 (9.89)</b>                 |

<sup>a</sup> J<sub>calc</sub> means the calculated from EQE spectra; <sup>b</sup> Statistical data obtained from 20 devices; <sup>c</sup> devices performed with CB solvent
